# Supplementary material for: A novel method for tyrosine assessment in vitro by using fluorescence enhancement of the ion-pair tyrosine-neutral red dye photo probe
Source: Royal Society of Chemistry journal article supplement (doi:10.1039/c2ay25089f), 2012-01-01
Supplement: c2ay25089f.pdf [file c2ay25089f.pdf]

**Tables:**

**Table 1: Effect of the interfering agents concentration on the selectivity of the NRD photo probe for TYR**

| Interfering agents |                                    |                                      |                         |
|--------------------|------------------------------------|--------------------------------------|-------------------------|
| Materials          | $\Delta F_1$ (380 nm)<br>Quenching | $\Delta F_2$ (610 nm)<br>Enhancement | Recovery<br>$\pm$ RSD % |
| Arginine           | 4                                  | 5                                    | $99.2 \pm 2.66$         |
| Cysteine           | 4                                  | 3                                    | $99.5 \pm 2.87$         |
| Glycine            | 2                                  | 4                                    | $98.3 \pm 3.10$         |
| Histidine          | 6                                  | 4                                    | $98.6 \pm 2.12$         |
| Lysine             | 5                                  | 2                                    | $99.8 \pm 2.11$         |
| Phenylalanine      | 4                                  | 2                                    | $99.34 \pm 2.98$        |
| Proline            | 3                                  | 6                                    | $99.45 \pm 1.98$        |
| Serine             | 3                                  | 5                                    | $99.78 \pm 2.70$        |
| Threonine          | 2                                  | 3                                    | $97.4 \pm 4.20$         |
| Tryptophan         | 15                                 | 14                                   | $99.7 \pm 2.12$         |
| Valine             | 2                                  | 3                                    | $99.4 \pm 2.00$         |
| Glucose            | 3                                  | 4                                    | $99.8 \pm 0.78$         |
| protein            | 2                                  | 2                                    | $99.8 \pm 1.78$         |

$\Delta F_1$  is the difference between the fluorescence intensity of the  $\text{NRD}^+\text{-TRY}^-$  ion pair in acetonitrile in absence and in the presence of interfering species at  $\lambda_{\text{em}} = 380$  nm.

$\Delta F_2$  is the difference between the fluorescence intensity of the  $\text{NRD}^+\text{-TRY}^-$  ion pair in acetonitrile in absence and in the presence of interfering species at  $\lambda_{\text{em}} = 610$  nm.

**Table 2. Sensitivity and regression parameters for photo probe.**

| Parameter                                          | values                                |
|----------------------------------------------------|---------------------------------------|
| $\lambda_{em}$ , nm                                | 610                                   |
| Linear range, mol L <sup>-1</sup>                  | $1 \times 10^{-5} - 5 \times 10^{-9}$ |
| Limit of detection (LOD), mol L <sup>-1</sup>      | $2.7 \times 10^{-9}$                  |
| Limit of quantification (LOQ), mol L <sup>-1</sup> | $8.9 \times 10^{-9}$                  |
| Regression equation, Y*                            |                                       |
| Intercept (a)                                      | 15.05                                 |
| Slope (b)                                          | $6.4 \times 10^9$                     |
| Standard deviation                                 | 0.053                                 |
| Variance (Sa <sup>2</sup> )                        | $2.8 \times 10^{-3}$                  |
| Regression coefficient (r)                         | 0.993                                 |

\*Y=a+bX, Where Y is luminescence intensity, X is concentration in n mol L<sup>-1</sup>, a is intercept, b is slope.

**Table 3: Comparison of NRD photo probe method with different methods of the determination of (TYR)**

| Sample (TYR)                     | Method                      | Linear range<br>(mol L <sup>-1</sup> )                           | Detection limit<br>(mol L <sup>-1</sup> )  | References   |
|----------------------------------|-----------------------------|------------------------------------------------------------------|--------------------------------------------|--------------|
| Compound amino acid injection    | Microcolumn electrophoresis | 0.60–90 mol L <sup>-1</sup>                                      | 0.20 mol L <sup>-1</sup>                   | [21]         |
| Serum                            | UV spectrophotometrically   | 0–64 mol L <sup>-1</sup>                                         | 5 mol L <sup>-1</sup>                      | [22]         |
| Urine                            | HPLC–APCI–MS/MS             | 0.03–10 mol L <sup>-1</sup>                                      | 0.025 mol L <sup>-1</sup>                  | [23]         |
| Pharmaceutical                   | Cyclic voltammetry          | 1×10 <sup>-7</sup> to 5×10 <sup>-5</sup> mol L <sup>-1</sup>     | 8×10 <sup>-8</sup> mol L <sup>-1</sup>     | [24]         |
| Serum and urine samples          | Spectrofluorimetry          | 1.1×10 <sup>-7</sup> to 1.1×10 <sup>-5</sup> mol L <sup>-1</sup> | 6.8×10 <sup>-8</sup> mol L <sup>-1</sup>   | [25]         |
| Spirulina and food samples       | Spectrofluorimetry          | 0.3–20.0 gm L <sup>-1</sup>                                      | 0.094 gm L <sup>-1</sup>                   | [26]         |
| Pharmaceutical and serum samples | NRD Photo Probe             | 1 x 10 <sup>-5</sup> – 5 x 10 <sup>-9</sup> mol L <sup>-1</sup>  | 2.7 X 10 <sup>-9</sup> mol L <sup>-1</sup> | Present work |

**Table 4.** Evaluation of intra-day and inter-day accuracy and precision.

| Method               | TYR taken* | Intra-day accuracy and precision (n=3) |      |       | Inter-day accuracy and precision (n=3) |      |       |
|----------------------|------------|----------------------------------------|------|-------|----------------------------------------|------|-------|
|                      |            | TYR Average Found* ±CL                 | %RE  | %RSD  | TYR average found* ±CL                 | %RE  | %RSD  |
| <b>Tyrosine, USA</b> | 3.0        | 3.07 ± 0.07                            | 2.33 | 0.007 | 3.11± 0.27                             | 2.75 | 0.036 |
|                      | 6.0        | 5.97 ± 0.05                            | 0.50 | 0.006 | 6.08± 0.19                             | 1.33 | 0.013 |
|                      | 9.0        | 8.92 ± 0.09                            | 0.88 | 0.002 | 9.09± 0.22                             | 1.00 | 0.010 |
| <b>Serum sample</b>  | 4.0        | 3.99 ± 0.20                            | 0.25 | 0.02  | 4.08± 0.20                             | 2.00 | 0.020 |
|                      | 6.0        | 5.98 ± 0.15                            | 0.33 | 0.01  | 6.09± 0.22                             | 1.50 | 0.015 |
|                      | 9.0        | 8.97 ± 0.22                            | 0.33 | 0.01  | 9.12± 0.29                             | 1.33 | 0.013 |

.The values are multiplied by  $10^{-7}$  mol L<sup>-1</sup> for method\*

RE. Percent relative error, %RSD. relative standard deviation and CL. Confidence limits were calculated % from:  $CL = \pm tS/\sqrt{n}$ . (The tabulated value of t is 4.303, at the 95% confidence level; S = standard deviation and .(n = number of measurements

**Table 5: Determination of (TYR) in pharmaceutical and serum preparations using  $\text{NRD}^+$ -TYR $^-$  photo probe.**

| Drug          | Taken ( $\times 10^{-7}$ M) | Found ( $\times 10^{-7}$ M) | Average $e^*$ | Average recovery $\pm$ R.S.D. (%)    | B.P. (LC)           |
|---------------|-----------------------------|-----------------------------|---------------|--------------------------------------|---------------------|
| Tyrosine, USA | 3.0                         | 3.08, 3.05, 3.10            | 3.07          | 102.3 $\pm$                          | 99.7 $\pm$<br>0.055 |
|               | 6.0                         | 6.02, 5.94, 5.96            | 5.97          | 0.007                                |                     |
|               | 9.0                         | 8.91, 8.92, 8.94            | 8.92          | 99.5 $\pm$ 0.006<br>99.1 $\pm$ 0.002 |                     |
| Serum sample  | 4.0                         | 3.94, 3.97, 4.08            | 3.99          | 99.75 $\pm$ 0.02                     | 99.5 $\pm$<br>0.050 |
|               | 6.0                         | 6.01, 6.05, 5.90            | 5.98          | 99.66 $\pm$ 0.01                     |                     |
|               | 9.0                         | 8.91, 8.91, 9.10            | 8.97          | 99.66 $\pm$ 0.01                     |                     |

**\*Average of nine measurements.**
